# Supplementary material for: Design and Development of Tools for Risk Evaluation of Diabetes and Cardiovascular Disease in Community Pharmacy
Source: Int J Environ Res Public Health. 2023 Feb 5;20(4):2819. doi: 10.3390/ijerph20042819 (PMC9956138; doi:10.3390/ijerph20042819)
Supplement: Supplementary file 1 [file ijerph-20-02819-s001.zip › Questionnaire A - Evaluation of the lifestyle booklet.pdf]

# Questionnaire A-

## Evaluation of the patient booklet

Participant n°.....

### Participant's characteristics

☐ Man ☐ Woman ☐ Other

Age:

- ☐ 25 – 35 years old
- ☐ 36 – 45 years old
- ☐ 46 – 55 years old
- ☐ 56 – 65 years old

Education level:

- ☐ No education or primary education
- ☐ High school
- ☐ Bachelor's degree
- ☐ Master's degree

### **PART 1 - Understanding**

**1. After reading the booklet, can you tell me in your own words what it is about?**

☐ Yes

☐ Nope

☐ Hardly

Comment:

**2. Do you find information in the booklet on how to eat healthier?**

☐ Yes

☐ Nope

☐ Hardly

Comment:

**3. Can you give me some examples of how to eat more balanced?**

The answer indicates an understanding of the text

☐ Yes

☐ Nope

☐ Hardly

Comment:

**4. Do you find information in the booklet on how to be more active?**

☐ Yes

☐ Nope

☐ Hardly

Comment:

**5. Can you give me some examples on how to move more?**

The answer indicates an understanding of the text

☐ Yes

☐ Nope

☐ Hardly

Comment:

**6. Do you find information in the booklet on how to reduce stress?**

☐ Yes

☐ Nope

☐ Hardly

Comment:

**7. Can you give me some examples of how to reduce stress?**

The answer indicates an understanding of the text

☐ Yes

☐ Nope

☐ Hardly

Comment:

## PART 2 – Perceptions

How would you qualify the following statements?

### Objectives

**1. At first glance, this booklet attracted my attention**

☐ Strongly agree

☐ Agree

☐ Neither agree,  
nor disagree

☐ Disagree

☐ Strongly disagree

*How could this booklet be made more attractive to you?*

Comment:

**2. It held my attention**

☐ Strongly agree

☐ Agree

☐ Neither agree,  
nor disagree

☐ Disagree

☐ Strongly disagree

*Why? How could this booklet be made more interesting for you?*

Comment:

**3. It is useful**

☐ Strongly agree

☐ Agree

☐ Neither agree,  
nor disagree

☐ Disagree

☐ Strongly disagree

*Why? How could this booklet be made more useful to you?*

Comment:

**4. I will recommend it to a friend or relative to read**

☐ Strongly agree

☐ Agree

☐ Neither agree,  
nor disagree

☐ Disagree

☐ Strongly disagree

*Could you tell me why?*

Comment:

## Content and topics

**5. I believe what is written**

☐ Strongly agree

☐ Agree

☐ Neither agree,  
nor disagree

☐ Disagree

☐ Strongly disagree

*Is there a part that you find less believable? Could you tell me why?*

Comment:

**6. What it says is important**

☐ Strongly agree

☐ Agree

☐ Neither agree,  
nor disagree

☐ Disagree

☐ Strongly disagree

*Why ? Is there a specific part that you think is less important?*

Comment:

**7. It reminds me of some things I need to think about**

☐ Strongly agree

☐ Agree

☐ Neither agree,  
nor disagree

☐ Disagree

☐ Strongly disagree

*Could you give me some examples? If not, are there things we could add that would be more helpful to you?*

Comment:

**8. It gives me new ideas or leads to implement**

☐ Strongly agree

☐ Agree

☐ Neither agree,  
nor disagree

☐ Disagree

☐ Strongly disagree

*Are these things you already know? On what subject would you like us to add new ideas/news?*

Comment:

**9. It breaks down the advice into achievable steps for me**

☐ Strongly agree

☐ Agree

☐ Neither agree,  
nor disagree

☐ Disagree

☐ Strongly disagree

*What advice doesn't seem reachable to you? Why? How could we make them more concrete?*

Comments:

**10. It changes some of my thinking**

☐ Strongly agree

☐ Agree

☐ Neither agree,  
nor disagree

☐ Disagree

☐ Strongly disagree

*Why? Could you give me some examples?*

Comment:

**11. It could change how I do things**

☐ Strongly agree

☐ Agree

☐ Neither agree,  
nor disagree

☐ Disagree

☐ Strongly disagree

*Why? Could you give me some examples?*

Comment:

## Layout

**12. It is easy to read**

☐ Strongly agree

☐ Agree

☐ Neither agree,  
nor disagree

☐ Disagree

☐ Strongly disagree

*Why? How could we make the booklet easier for you to read?*

Comment:

**13. It is easy to understand**

☐ Strongly agree

☐ Agree

☐ Neither agree,

☐ Disagree

☐ Strongly disagree

nor disagree

*Were there any words that were difficult for you to understand? How could we make the booklet easier to understand for you?*

Comment:

**14. The different sections make the document easy to navigate**

|                                         |                                |                                                      |                                   |                                            |
|-----------------------------------------|--------------------------------|------------------------------------------------------|-----------------------------------|--------------------------------------------|
| <input type="checkbox"/> Strongly agree | <input type="checkbox"/> Agree | <input type="checkbox"/> Neither agree, nor disagree | <input type="checkbox"/> Disagree | <input type="checkbox"/> Strongly disagree |
|-----------------------------------------|--------------------------------|------------------------------------------------------|-----------------------------------|--------------------------------------------|

*Why? How could we make the booklet easier to navigate for you?  
Could tabs for browsing the booklet help you?*

Comment:

**15. I like illustrations**

|                                         |                                |                                                      |                                   |                                            |
|-----------------------------------------|--------------------------------|------------------------------------------------------|-----------------------------------|--------------------------------------------|
| <input type="checkbox"/> Strongly agree | <input type="checkbox"/> Agree | <input type="checkbox"/> Neither agree, nor disagree | <input type="checkbox"/> Disagree | <input type="checkbox"/> Strongly disagree |
|-----------------------------------------|--------------------------------|------------------------------------------------------|-----------------------------------|--------------------------------------------|

*Why? Do you think the photos represent you?*

Comment:

**16. The illustrations are easy to understand**

|                                         |                                |                                                      |                                   |                                            |
|-----------------------------------------|--------------------------------|------------------------------------------------------|-----------------------------------|--------------------------------------------|
| <input type="checkbox"/> Strongly agree | <input type="checkbox"/> Agree | <input type="checkbox"/> Neither agree, nor disagree | <input type="checkbox"/> Disagree | <input type="checkbox"/> Strongly disagree |
|-----------------------------------------|--------------------------------|------------------------------------------------------|-----------------------------------|--------------------------------------------|

*Why? What makes it difficult to understand? Could you show me?*

Comment:

## Conclusion

**17. What do you think of the “28 days to improve myself” part?**

*Personally, would you use this part? Why ?*

**18. In general, what do you think of the booklet and the information it contains?**

*What are the positive points? What are the negative points?*

Comment:

**19. Are there any sections/information you would like to have that are missing from the booklet?**

Comment:

**20. Is there anything else we haven't covered that you would like to mention?**

Comment:
