# Supplementary material for: Design and Development of Tools for Risk Evaluation of Diabetes and Cardiovascular Disease in Community Pharmacy
Source: Int J Environ Res Public Health. 2023 Feb 5;20(4):2819. doi: 10.3390/ijerph20042819 (PMC9956138; doi:10.3390/ijerph20042819)
Supplement: Supplementary file 1 [file ijerph-20-02819-s001.zip › Questionnaire B - Evaluation of the folders.pdf]

# Questionnaire B – Evaluation of the folders

BROCHURE: diabetes / cardiovascular diseases

Participant n° .....

## Participant's characteristics

☐ Man ☐ Woman ☐ Other

Age:

- ☐ 25 – 35 years old
- ☐ 36 – 45 years old
- ☐ 46 – 55 years old
- ☐ 56 – 65 years old

Education level:

- ☐ No education or primary education
- ☐ High school
- ☐ Bachelor's degree
- ☐ Master's degree

## **PART 1 - Understanding**

**1. After reading the folder, can you tell me in your own words what it is about?**

☐ Yes ☐ Nope ☐ Hardly

Comments:

**2. Do you find explanations on what diabetes/cardiovascular disease is?**

☐ Yes ☐ Nope ☐ Hardly

Comments:

**3. Can you tell me what you understood about diabetes/cardiovascular disease?**

The answer indicates an understanding of the text

☐ Yes ☐ Nope ☐ Hardly

Comments:

**4. Does the folder explain what puts a person at risk for diabetes/cardiovascular disease?**

☐ Yes ☐ Nope ☐ Hardly

Comments:

**5. Can you tell me what puts a person at risk for diabetes/cardiovascular disease?**

The answer indicates an understanding of the text

☐ Yes

☐ Nope

☐ Hardly

Comments:

**6. Does the folder give advice on how to avoid diabetes/cardiovascular disease?**

Can you find some of them in the brochure?

☐ Yes

☐ Nope

☐ Hardly

Comments:

**7. Can you tell me what the complications of diabetes/cardiovascular disease are?**

The answer indicates an understanding of the text

☐ Yes

☐ Nope

☐ Hardly

Comments:

## **PART 2 – Perceptions**

How would you qualify the following statements?

### **Objectives**

**1. At first glance, it attracted my attention?**

☐ Strongly agree

☐ Agree

☐ Neither agree,  
nor disagree

☐ Disagree

☐ Strongly disagree

*How could this brochure be made more attractive to you?*

Comment:

**2. It held my attention**

☐ Strongly agree

☐ Agree

☐ Neither agree,  
nor disagree

☐ Disagree

☐ Strongly disagree

*Why? How could we make this brochure more interesting for you?*

Comment:

### 3. It is useful

☐ Strongly agree

☐ Agree

☐ Neither agree,  
nor disagree

☐ Disagree

☐ Strongly disagree

*Why? How could this brochure be made more useful to you?*

Comment:

### 4. I will recommend it to a friend or relative to read

☐ Strongly agree

☐ Agree

☐ Neither agree,  
nor disagree

☐ Disagree

☐ Strongly disagree

*Could you tell me why?*

Comment:

## Content and topics

### 5. I believe what is written

☐ Strongly agree

☐ Agree

☐ Neither agree,  
nor disagree

☐ Disagree

☐ Strongly disagree

*Is there a part that you find less believable? Could you tell me why?*

Comment:

### 6. What it says is important

☐ Strongly agree

☐ Agree

☐ Neither agree,  
nor disagree

☐ Disagree

☐ Strongly disagree

*Why? Is there a specific part that you think is less important?*

Comment:

### 7. It reminds me of some things I need to think about

☐ Strongly agree

☐ Agree

☐ Neither agree,  
nor disagree

☐ Disagree

☐ Strongly disagree

*Could you give me some examples? If not, are there things we could add that would be more helpful to you?*

Comment:

**8. It gives me new ideas or leads to implement**

☐ Strongly agree

☐ Agree

☐ Neither agree,  
nor disagree

☐ Disagree

☐ Strongly disagree

*Are these things you already know? On what subject would you like us to add new ideas/news?*

Comment:

**9. It changes some of my thinking**

☐ Strongly agree

☐ Agree

☐ Neither agree,  
nor disagree

☐ Disagree

☐ Strongly disagree

*Why? Could you give me some examples?*

Comment:

**10. It could change how I do things**

☐ Strongly agree

☐ Agree

☐ Neither agree,  
nor disagree

☐ Disagree

☐ Strongly disagree

*Why? Could you give me some examples?*

Comment:

## Layout

**11. It is easy to read**

☐ Strongly agree

☐ Agree

☐ Neither agree,  
nor disagree

☐ Disagree

☐ Strongly disagree

*Why? How could we make this brochure easier for you to read?*

Comment:

**12. It is easy to understand**

☐ Strongly agree

☐ Agree

☐ Neither agree,  
nor disagree

☐ Disagree

☐ Strongly disagree

*Were there any words that were difficult for you to understand? How could we make this brochure easier for you to understand?*

Comment:

**13. I like illustrations**

☐ Strongly agree      ☐ Agree      ☐ Neither agree, nor disagree      ☐ Disagree      ☐ Strongly disagree

*Why? How could we improve the illustration(s)?*

Comment:

**14. The illustrations are easy to understand**

☐ Strongly agree      ☐ Agree      ☐ Neither agree, nor disagree      ☐ Disagree      ☐ Strongly disagree

*Why? What do you find difficult to understand?*

Comment:

**15. I love the colors**

☐ Strongly agree      ☐ Agree      ☐ Neither agree, nor disagree      ☐ Disagree      ☐ Strongly disagree

*Why?*

Comments:

## Conclusion

**16. In general, what do you think of the folder and the information it contains?**

*What are the positives? What are the negative points?*

Comment:

**17. Is there any information you would like to have that is missing from the folder?**

Comment:

**18. Is there anything else we haven't covered that you would like to mention?**

Comment:
